# Supplementary material for: Circular RNA hsa_circ_0000190 Facilitates the Tumorigenesis and Immune Evasion by Upregulating the Expression of Soluble PD-L1 in Non-Small-Cell Lung Cancer
Source: MDPI journal article supplement (doi:10.3390/ijms23010064), 2021-12-22
Supplement: s1 [file s1]

## Supplementary materials

**Supplementary Materials Table S1: List of nucleic acid sequences for qPCR Primers**

| qPCR Primer      |                         |                         |
|------------------|-------------------------|-------------------------|
| Gene name        | Forward sequence        | Reverse sequence        |
| Hsa_circ_0000190 | GGCAGCTGAAGTCACACATGAA  | CCAGTGCAATGACATGAGCAGT  |
| GAPDH            | GTCTCCTCTGACTTCAACAGCG  | ACCACCCTGTTGCTGTAGCCAA  |
| PD-L1            | TGCCGACTACAAGCGAATTACTG | CTGCTTGTCCAGATGACTTCGG  |
| CD80             | CTCTTGGTGCTGGCTGGTCTTT  | GCCAGTAGATGCGAGTTTGTGC  |
| CD43             | GCAACCAGTCATCCTGCTGTTC  | CTGGTCCTACTGGAGGTTTCTG  |
| CD155            | CACTGTCACCAGCCTCTGGATA  | TCATAGCCAGAGATGGATACCTC |
| CD70             | TTCGCACAGGCTCAGCAGCAG   | TTGTCCAGCTCTGGTCCATGCA  |
| FGL1             | GAAGATCAGTCTGGCTGGTGGT  | TGCCAGGTGTACCAGACAATCC  |
